# Supplementary material for: Ventilatory sensitivity to ammonia in the Pacific hagfish (Eptatretus stoutii), a representative of the oldest extant connection to the ancestral vertebrates
Source: Oxford University Press journal article supplement (doi:10.1242/jeb.199794), 2019-01-01
Supplement: jeb199794supp.pdf [file jeb199794supp.pdf]

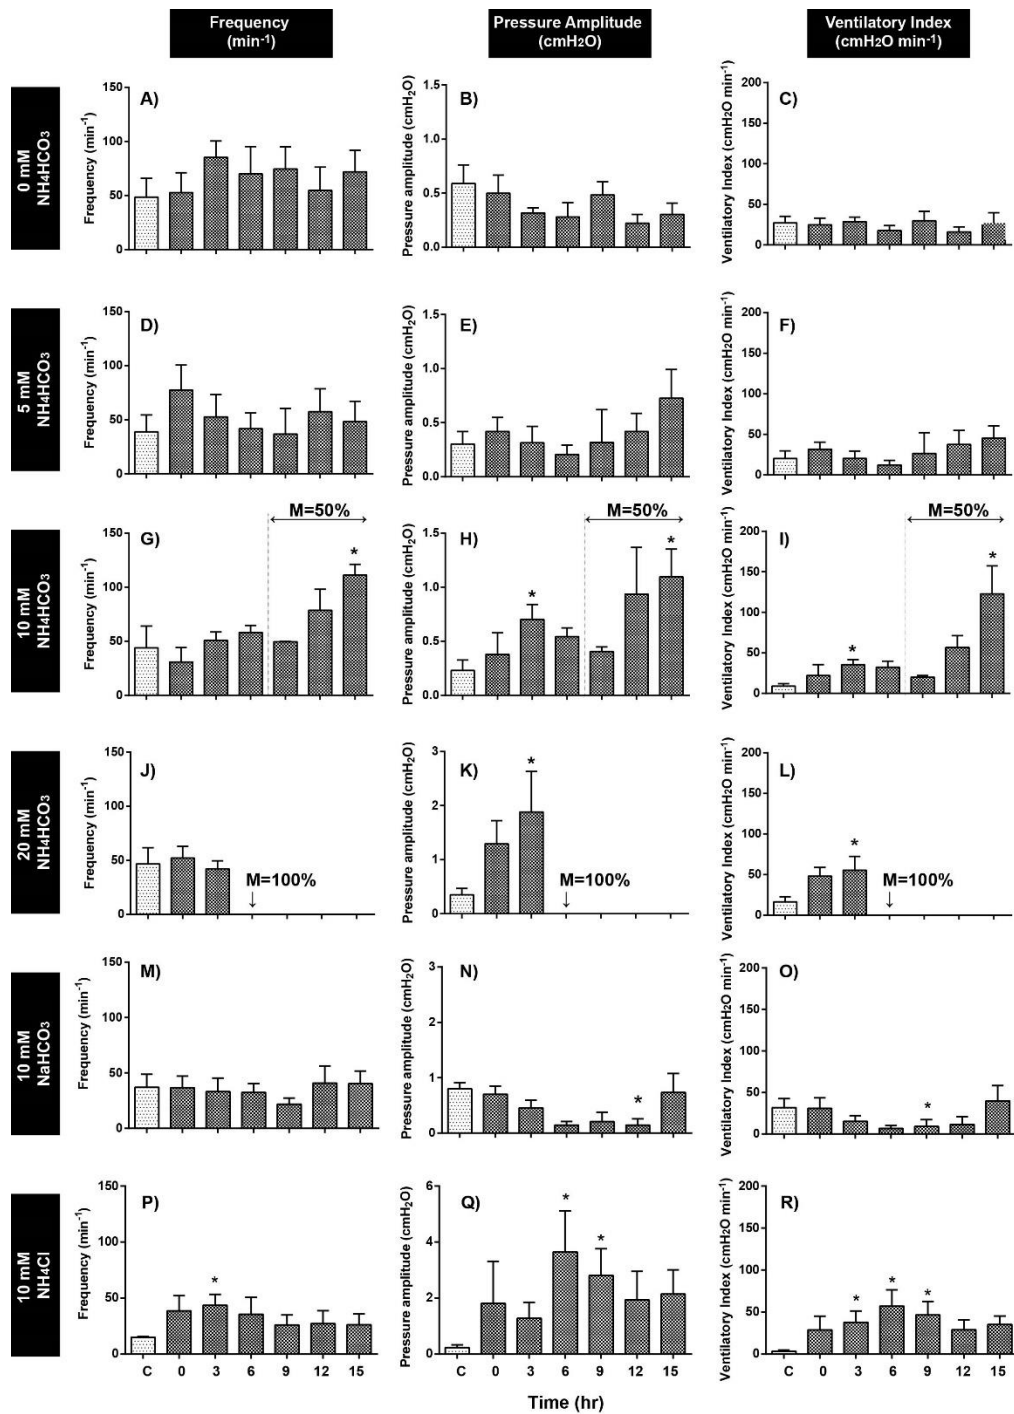

**Figure S1.** Responses over time in ventilatory parameters of hagfish (N = 6 per each treatment) exposed (from top to bottom) to 0 (no addition control), 5, 10, and 20 mM NH<sub>4</sub>HCO<sub>3</sub> as high environmental ammonia (HEA) treatments, in Series I. Exposure to 10 mM NaHCO<sub>3</sub> (N = 6) as a bicarbonate control treatment, and 10 mM NH<sub>4</sub>Cl (N = 6) as an alternate form of HEA were also evaluated. Means ± 1 S.E.M. ‘M’ in panels G, H, I, J, K, and L indicates percent mortality out of N = 6. Asterisk (\*) indicates significant difference (p < 0.05) from pre-exposure control value (“C”).

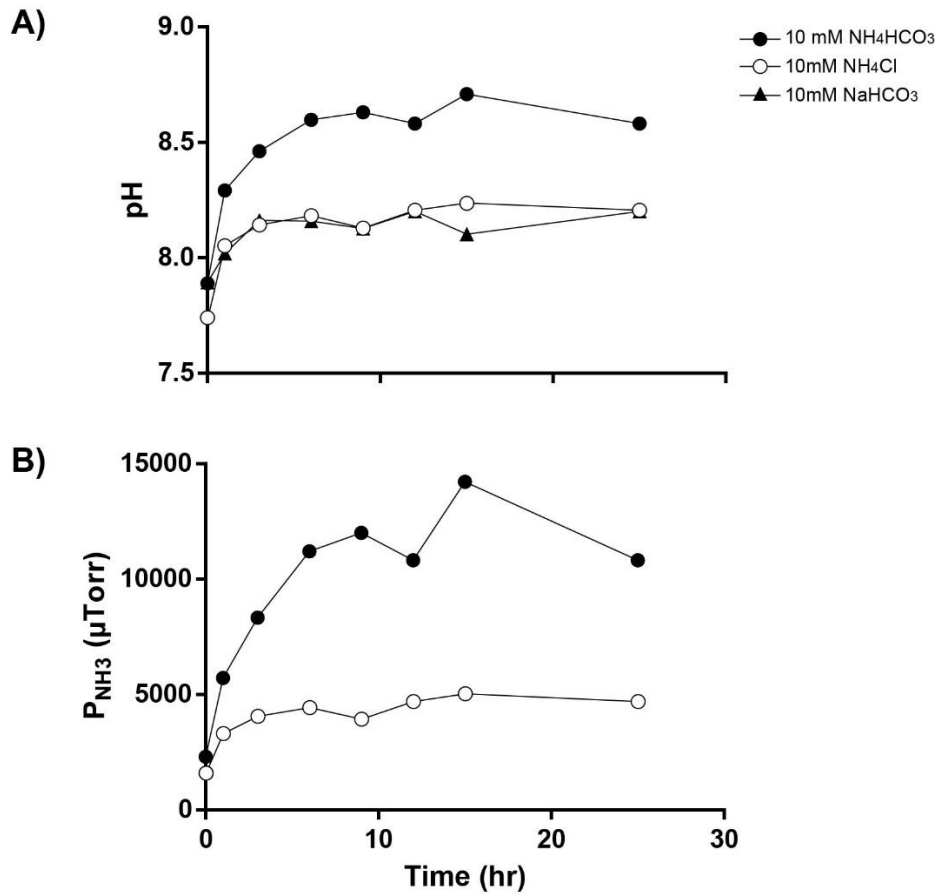

**Figure S2.** (A) Changes in pH over time of sea water (30 ppt) containing either 10 mM  $NH_4HCO_3$ , 10 mM  $NH_4Cl$ , or 10 mM  $NaHCO_3$ , and continuously bubbled with air, in Series I. The sea water containing 10 mM  $NH_4HCO_3$ , was alkalized to a greater extent than in the other two treatments. (B) Calculated  $P_{NH_3}$  levels over time in the 10 mM  $NH_4HCO_3$  or 10 mM  $NH_4Cl$  exposures, based on the pH values recorded in panel (A).

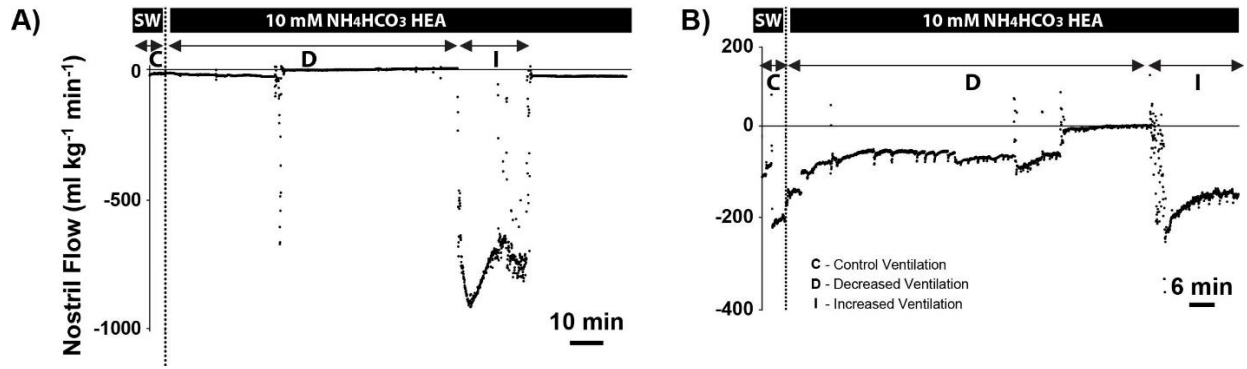

**Figure S3.** Two more examples (analogous to Fig. 3A) of flowmeter recordings of nostril ventilatory flow rate (measured directly via a flow probe placed in the nostril entrance) in hagfish exposed to 10 mM NH<sub>4</sub>HCO<sub>3</sub> (HEA) in Series III. Note that these are flow recordings in contrast to the pressure recordings of Figs. 1 and 5. The data were recorded during the pre-exposure control period (“C”) during the period of greatest initial decrease (“D”), and greatest subsequent increase (“I”) in nostril ventilatory flow during the HEA treatment for each animal.

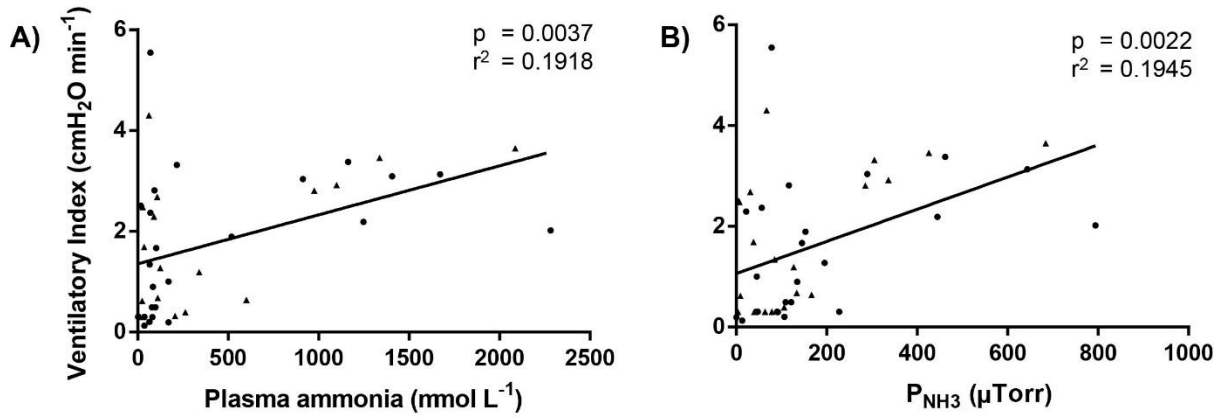

**Figure S4.** Correlation of ventilatory index with (A) total plasma ammonia concentration ( $T_{\text{Amm}}$ ) and (B) gaseous ammonia tension ( $P_{\text{NH}_3}$ ) in individual hagfish injected at a dose of  $1,000 \mu\text{mol kg}^{-1}$  or  $70 \mu\text{mol kg}^{-1}$  of ammonium salts ( $\text{NH}_4\text{HCO}_3$  and  $\text{NH}_4\text{Cl}$ ) in Series IV. The significance ( $p$ ) and  $r^2$  values are shown.
